# Supplementary material for: Reproducibility in Cognitive Hearing Research: Theoretical Considerations and Their Practical Application in Multi-Lab Studies
Source: PubMed Central journal article supplement (PMC7378399; doi:10.3389/fpsyg.2020.01590), 2020-07-16
Supplement: Data_Sheet_2.pdf [file Data_Sheet_2.pdf]

## *Supplementary Material*

### Supplementary Table 2

**Supplementary Table 2.** Examples of studies providing retest reliability coefficients for the same cognitive tests. HL = hearing loss; MMHL = mild-to-moderate hearing loss; HA = hearing aid users; NH = normal hearing; ICC = Intraclass Correlation Coefficient, PPMC = Pearson's Product-Moment Correlation; ? = information not provided

| Test                            | Mode of administration | Sample Size (N) | Age range              | Group tested   | Time between administrations (mean/median) | Type of test-retest coefficient | Value                        | Systematic difference between sessions (e.g., Practice / memory effects) | Reference                                                                                                                             |
|---------------------------------|------------------------|-----------------|------------------------|----------------|--------------------------------------------|---------------------------------|------------------------------|--------------------------------------------------------------------------|---------------------------------------------------------------------------------------------------------------------------------------|
| Digit Span (forward & backward) | Face-to-face           | 21              | 50 – 74<br>65.0 (mean) | Mild HL        | 4 weeks                                    | ICC                             | 0.88                         | No                                                                       | Ferguson and Henshaw (2015)<br><br>Ferguson, Henshaw, Clark, and Moore (2014) for information on demography, design, practice effects |
| Digit Span forward              | Face-to-face           | 24              | 50.1 (mean)            | Hypertensives  | 7-10 days                                  | PPMC                            | 0.78                         | No                                                                       | McCaffrey, Ortega, Orsillo, Nelles, and Haase (1992)                                                                                  |
| Digit Span backward             |                        | 24              |                        |                |                                            |                                 | 0.85                         | Yes                                                                      |                                                                                                                                       |
| Digit Span                      | Face-to-face           | 122             | 57 – 85<br>70.4 (mean) | Healthy        | 3 administrations,<br>1 year apart         | ?                               | 0.64 (Y1-Y2)<br>0.64 (Y2-Y3) | ?                                                                        | Mitrushina and Satz (1991)                                                                                                            |
| Letter Number Sequencing        | Face-to-face           | 30              | 50 - 74<br>67.4 (mean) | MMHL, HA users | 1 week                                     | ICC                             | 0.83                         | ?                                                                        | Ferguson and Henshaw (2015)<br><br>Henshaw and Ferguson (2014) for information on demography and design                               |

Supplementary Material

| Test                                             | Mode of administration         | Sample Size (N) | Age range               | Group tested              | Time between administrations (mean/median) | Type of test-retest coefficient | Value        | Systematic difference between sessions (e.g., Practice / memory effects) | Reference                                                      |
|--------------------------------------------------|--------------------------------|-----------------|-------------------------|---------------------------|--------------------------------------------|---------------------------------|--------------|--------------------------------------------------------------------------|----------------------------------------------------------------|
| Letter Number Sequencing                         | Computerized assessment        | 15              | 23.9 (mean)             | Healthy                   | 10-12 days                                 | ICC                             | 0.65         | No                                                                       | Vora, Varghese, Weisenbach, and Bhatt (2016)                   |
| Phonological fluency (letter S)                  | Face-to-face, 1min             | 99              | 39 - 75                 | Healthy                   | 1 month                                    | PPMC / Spearman                 | 0.63         | Yes                                                                      | Bird, Papadopoulou, Ricciardelli, Rossor, and Cipolotti (2004) |
| Semantic fluency (animals)                       |                                |                 |                         |                           |                                            |                                 | 0.56         |                                                                          |                                                                |
| Phonological fluency 3 letters (letters F, A, S) | Face-to-face, 1min             | 90              | Working age             | Healthy                   | 1 – 8 weeks                                | PPMC                            | 0.82         | ?                                                                        | Harrison, Buxton, Husain, and Wise (2000)                      |
| Phonological fluency letter B                    |                                | 90              |                         |                           |                                            |                                 | 0.73         |                                                                          |                                                                |
| Semantic fluency (animal)                        |                                | 90              |                         |                           |                                            |                                 | 0.68         |                                                                          |                                                                |
| Category naming (Semantic fluency)               | Computerized assessment, 1 min | 15              | 23.9 (mean)             | Healthy                   | 10-12 days                                 | ICC                             | 0.78         | No                                                                       | Vora et al. (2016)                                             |
| Trail Making A                                   | Face-to-face                   | 25              | 50.1 (total group mean) | Hypertensives             | 7 – 10 days                                | PPMC                            | 0.80         | No                                                                       | McCaffrey et al. (1992)                                        |
| Trail Making B                                   |                                | 24              |                         | Chronic cigarette smokers |                                            |                                 | 0.92         | No                                                                       |                                                                |
|                                                  |                                | 32              | 59.1 (total group mean) |                           |                                            |                                 | 0.49         | Yes                                                                      |                                                                |
| Trail Making A                                   | Face-to-face                   | 122             | 57 – 85<br>70.4 (mean)  | Healthy                   | 3 administrations, 1 year apart            | ?                               | 0.53 (Y1-Y2) | ?                                                                        | Mitrushina and Satz (1991)                                     |
| Trail Making B                                   |                                |                 |                         |                           |                                            |                                 | 0.56 (Y2-Y3) |                                                                          |                                                                |
| Trail Making Test A                              | Computerized assessment        | 16              | 18 – 34<br>24 (mean)    | Healthy                   | 3 administrations, 1 week apart            | PPMC / Spearman                 | 0.52 (W1-W2) | No                                                                       | Palmer, Langbehn, Tabrizi, and Papoutsi (2018)                 |
| Trail Making Test B                              |                                |                 |                         |                           |                                            |                                 | 0.55 (W2-W3) | No                                                                       |                                                                |

## References

- Bird, C. M., Papadopoulou, K., Ricciardelli, P., Rossor, M. N., & Cipolotti, L. (2004). Monitoring cognitive changes: Psychometric properties of six cognitive tests. *British Journal of Clinical Psychology, 43*, 197-210.
- Ferguson, M. A., & Henshaw, H. (2015). How does auditory training work? Joined-p thinking and listening. *Seminars in Hearing, 36*(4), 237-249.
- Ferguson, M. A., Henshaw, H., Clark, D. P., & Moore, D. R. (2014). Benefits of phoneme discrimination training in a randomized controlled trial of 50- to 74-year-olds with mild hearing loss. *Ear and Hearing, 35*(4), e110-121. doi:10.1097/AUD.0000000000000020
- Harrison, J. E., Buxton, P., Husain, M., & Wise, R. (2000). Short test of semantic and phonological fluency: Normal performance, validity and test-retest reliability. *British Journal of Clinical Psychology, 39*, 181-191.
- Henshaw, H., & Ferguson, M. A. (2014). *Assessing the benefits of auditory training to real-world listening: Identifying appropriate and sensitive outcomes*. Paper presented at the ISAAR 2013: Auditory Plasticity—Listening with the Brain. 4th Symposium on Auditory and Audiological Research, Nyborg, Denmark.
- McCaffrey, R. J., Ortega, A., Orsillo, S. M., Nelles, W. B., & Haase, R. F. (1992). Practice effects in repeated neuropsychological assessments. *The Clinical Neuropsychologist, 6*(1), 32-42. doi:10.1080/13854049208404115
- Mitrushina, M., & Satz, P. (1991). Effect of repeated administration of a neuropsychological battery in the elderly. *Journal of Clinical Psychology, 47*(6), 790-801.
- Palmer, C. E., Langbehn, D., Tabrizi, S. J., & Papoutsis, M. (2018). Test-retest reliability of measures commonly used to measure striatal dysfunction across multiple testing sessions: A longitudinal study. *Frontiers in Psychology, 8*, 2363. doi:10.3389/fpsyg.2017.02363
- Vora, J. P., Varghese, R., Weisenbach, S. L., & Bhatt, T. (2016). Test-retest reliability and validity of a custom-designed computerized neuropsychological cognitive test battery in young healthy adults. *Journal of Psychology and Cognition, 1*(1), 11-19.
